1

2 Utilization and Factors Associated with Health Facility Delivery among Women of  
3 Reproductive Age in Rural Ethiopia: Mixed effect logistic regression analysis.

---

4 Birhan Ewunu Semagn\*

5 \*Corresponding author: [ewunubirhan@gmail.com](mailto:ewunubirhan@gmail.com)

6 Department of Public Health, Asrat Weldeyes Health Science Campus, Debre Berhan University, Ethiopia

7

8

9

10

## 11 **Abstract**

12 **Background:** Worldwide over 800 women lose their life each day from complication in pregnancy and child birth. Inequity by  
13 urban–rural residence is one of the most pronounced challenges in maternal health service coverage with women living in rural areas  
14 at a greater disadvantage than other women. This study aims to assess the magnitude and factors affecting the utilization of health  
15 facility delivery for the most recent live birth among women of reproductive age in rural Ethiopia.

16 **Methods:** This is a cross-sectional study based on a data from Ethiopian Mini Demographic and Health Survey 2019 dataset with a  
17 total weighted sample of 2900 women of reproductive age group in rural Ethiopia. Data cleaning, coding and labeling were done using  
18 STATA version 14 software. Multilevel mixed effect logistic regression model was employed to identify associated factors.

19 **Result:** Only 44% of reproductive-age women in rural Ethiopia gave their most recent live birth in health institutions .In the  
20 multivariable multilevel binary logistic regression analysis educational status ,wealth index, religion, household family size, attending  
21 4+ANC,and had ANC in the first trimester of pregnancy were found to be statistically significant factors associated with health  
22 facility delivery.

23 **Conclusion:** In a rural part of Ethiopia, the prevalence of institutional delivery is low. Special emphasis should be given for mothers  
24 with no formal education, with poor household wealth index, traditional religious followers, and mothers with more than five  
25 household family sizes. Furthermore implementing public health programs that target to enable women to have early first trimester  
26 Ante Natal Care, and more frequent Ante Natal Care follow-up may increase the number of health facility deliveries.

27 **Key Words:** Health facility delivery, rural, EMDHS, Ethiopia

## 28 **Background**

29 Based on recent evidence there were decline in number of women and girls who lose their life each year related to complications of  
30 pregnancy and childbirth, with a decline from 451,000 in 2000 to 295,000 in 2017. But Still, we are losing over 800 women each day  
31 in death from complications in pregnancy and childbirth(1). Despite all other reasons, low institutional delivery is one of the root  
32 causes of high maternal and newborn mortality(2).

33 Even though reducing global maternal mortality ratio (MMR) to lower than 70 per 100,000 live births is one of the Sustainable  
34 Development Goals(SDG) to be accomplished by 2030, maternal mortality mainly attributed to obstetric hemorrhage is still one of  
35 Africa's leading public health challenge(3, 4). Despite there was good progress in reducing maternal mortality in Sub-Saharan  
36 African countries, there are the most off-track achievements of region-based maternal deaths, where the burden is still highest in rural  
37 women as compared to those urban women(5). Over two thirds (68%) of all maternal deaths globally occurs in Sub-Saharan Africa  
38 with around 200,000 maternal deaths a year or 533 maternal deaths per 100,000 live births (1).

39 In low-income countries, most newborn deaths occur at home(6), and in rural Ethiopia, nearly one in every ten (11%) of neonates die  
40 before celebrating their first month of life, mainly during the first week(7). Institutional delivery is one of the key strategies for  
41 reducing maternal mortality and for ensuring safe birth by reducing and intervening in any complications that will occur to the mother  
42 and her newborn during delivery and up to 24 hours postpartum (8, 9).

43 Even though addressing people who are more disadvantaged and have lower levels of health service utilization is one of the key parts  
44 of achieving SDG, inequalities by urban–rural residence are one of the most pronounced challenges in maternal health service  
45 coverage with women living in rural areas at a greater disadvantage than other women(10). For achieving the 2030 development goal  
46 of health facility delivery in sub-Saharan Africa narrowing the gap or inequity between the rural and the urban areas is one of the ways  
47 forwarded (11). Studies highlight that the urban-rural difference in institutional delivery was higher in East Africa especially the  
48 disparity is worst in the case of Ethiopia (12, 13). Although the Federal Ministry of Health of Ethiopia initiated a free delivery service  
49 policy in all public health facilities to encourage mothers to deliver in health facilities, utilization of institutional deliveries remains  
50 minimal with a pooled prevalence of 31% (2, 14). In Ethiopia, based on the most recent Ethiopian Mini Demographic and Health  
51 Survey( EMDHS) 2019 report seventy percent of live births in the 5 years before EMDHS2019 from urban women were delivered in a  
52 health facility while only forty percent of live births from rural women were delivered in a health facility(15). Therefore, highlighting  
53 important factors for the designing and implementing tailored public health interventions for improving institutional delivery in rural  
54 Ethiopia is needed.

55 Previous research has shown the magnitude and factors associated with institutional delivery in Ethiopia (14, 16-21), but as per the  
56 knowledge of the author, no study in Ethiopia investigates the determinants of health facility delivery of reproductive-age women in  
57 rural Ethiopia using nationally representative data. The very few studies conducted previously were either based on a small sample or  
58 a small segment of the population of rural Ethiopia. Therefor this study aimed to fill this gap by assessing the magnitude and factors

59 affecting the utilization of health facility delivery for the most recent live birth among women of reproductive age in rural Ethiopia  
60 using data from the most recent EMDHS.

## 61 **Methods**

### 62 **Study design, Data source, and Setting**

63 This is a cross-sectional study conducted from October 10, 2022-December 29, 2022 using data extracted from the latest EMDHS  
64 2019. The data were obtained from the Demographic and Health survey (DHS) website (<https://dhsprogram.com/data/>) after  
65 submitting a request justifying the aim of the study. The 2019 EMDHS is the second EMDHS and the fifth DHS conducted in  
66 Ethiopia from March 21, 2019, to June 28, 2019. The survey was implemented based on a nationally representative sample that  
67 provided estimates for the urban and rural areas at the national and regional levels. 8,885 women of reproductive age (age 15-49)  
68 were interviewed from a nationally representative sample of 8,663 households(15). Ethiopia is a country in the Horn of Africa with a  
69 total area of 1,100,000 km<sup>2</sup> and lies between latitude 3° and 15° north and longitude 33° and 48 east(22). During the time of the  
70 survey, Ethiopia had nine ethnic-based and politically autonomous regional states and two cities (Addis Ababa and Dire Dawa).

### 71 **Population and sampling procedure**

72 This study used all women of childbearing age (15–49 years) with a live birth in the five years preceding the survey in rural Ethiopia.  
73 The most recent birth was considered for women with two or more live births during the five-year period. EMDHS 2019 used a two-

74 step stratified cluster sampling method, in which sample households were selected in cluster enumeration areas (EAs). In the first  
75 stage, 305 EAs were selected (93 in urban areas and 212 in rural areas) with probability in proportion to EA size. In the second stage,  
76 a fixed number of 30 households in each cluster were selected. A household listing operation was carried out in all selected EAs from  
77 January through April 2019. Further information related to the population, study area, data collection, sampling procedure, and  
78 questionnaires used in the survey were detailed in the 2019 EMDHS Report(15). In the current analysis, as shown in the figure (Fig 1),  
79 a weighted total of 2900 mothers who resides in a rural part of Ethiopia were included.

80

81 **Fig 1: The sampling procedure of study participants and the final sample size considered in this study from 2019 EMDHS**  
82 **dataset.**

### 83 **Study variables**

84 An outcome variable is place of delivery, which is dichotomized as a “health facility” (if a woman gives birth in public, private, or  
85 NGO health institutions) and a “Non-health facility” (if a woman gives birth either in home or any other places) (23).

86 The potential covariates considered to have an association with health facility delivery were chosen based on prior literature and based  
87 on the presence of the variable of interest in the 2019EDHS dataset (14, 19, 21, 24). These variables were woman’s age, woman’s  
88 educational status, wealth index, religion, household family size, sex of household head, mass media exposure, Visiting skilled

89 providers during Ante Natal Care (ANC), history of giving birth to a boy or girl who was born alive but later died, frequency of ANC,  
90 and the timing of ANC.

---

91 **Description and measurement of independent Variables**

---

92 Age of respondents: the age of the women was re-coded into three categories with values of “1” for 15–24, "2" for 25-34 , and  
93 “0” for 35 and above

94 Educational status: this is the minimum educational level a woman achieved with a value of “0” for no education, “1” for primary  
95 education, “2” for secondary education, and "3" for higher education.

96 Wealth index: The datasets contained a wealth index that was created using principal components analysis coded as “poorest”,  
97 “poorer”, “Middle”, “Richer”, and “Richest in the EMDHS data set.” For this study, it was recoded into three categories “poor”  
98 (includes the poorest and the poorer categories), “middle”, and “rich” (includes the richer and the richest categories)

99 Marital status: This was the marital status of women at the time of survey and recoded into three categories with a value of “0” for  
100 never in union,"1" for those married or living with partner, and “2” for those widowed, divorced and no longer living  
101 together/separated

102 Religion: The variable religion was recorded as orthodox, Muslim, protestant, catholic, traditional, and other in the dataset and we  
103 used it without change.

---

104 Sex of household head: the variable sex of household head was recorded as male and female in the dataset and we used without  
105 change

106 Having a son or daughter died: A composite variable obtained by combining if a woman has a son or daughter died with a value of“0”  
107 if a woman didn't have a son or daughter died, and “1” if a woman has a son or daughter died.

108 Media exposure: A composite variable obtained by combining whether there was a radio and /or TV in the respondent’s household  
109 with a value of“0” if a woman didn't has either TV or Radio in her household and “1” if a woman has access to either of the media

110 Household size : The family size of the women's household re-coded into two categories with values of“0” for a family size greater  
111 than 5, and “1” for a family size of less than or equal to 5.

112 Region: Geopolitical features of regions were grouped in to three categories: Metropolitan for Harrar and Drie-Dawa, Large central  
113 for Amhara, Oromia, South Nations and nationalities and Tigray, and Small peripheral for Afar, Benishangule, Gambella, and  
114 Somalia.

115 Frequency of ANC visit: The number of ANC visits during pregnancy were categorized into two groups and recoded as 1 "yes “if a  
116 woman have greater than or equal to four ANC, and 0 "No “if a woman didn't have greater than or equal to four ANC visit for the  
117 most recent live birth

---



---

118 Timing of ANC visit: The timing of ANC visits were categorized into two groups and recoded as 1 "yes" if a woman have ANC  
119 visit in the first trimester of her pregnancy to the most recent live birth , 0 "No" if a woman didn't have ANC visit in the first  
120 trimester of their pregnancy to the most recent live birth.

121 ANC by skilled providers : A composite variable recoded as 1 "yes" if a woman received care from skilled providers, such as  
122 doctors, nurses/midwives, health officers, and health extension workers, and 0 "no" if she didn't receive care from either of these  
123 professions during her pregnancy of the most recent live birth

124

---

125

## 126 **Data management and analysis**

127 After extracting the data from EMDHS 2019, further coding and descriptive analysis were done using STATA version 14. The DHS  
128 data was weighted using sampling weight, primary sampling unit, and strata before any statistical analysis to restore the  
129 representativeness of the survey and to tell the STATA to take into account the sampling design when calculating standard errors to  
130 get reliable statistical estimates. Due to the hierarchical nature of EMDHS data, women within the same cluster may be more similar  
131 to each other than women in the rest of the country. This violates the assumption of independence of observations and equal variance  
132 across clusters. This implies the need to use advanced models considering the between-cluster variability. Due to the dichotomous  
133 nature of the outcome variable logistic regression and mixed effect Logistic regression were fitted. Model comparison was done using

134 Akaike's information criterion (AIC) value, Bayesian information criterion (BIC) value ,and Deviance Information Criteria (DIC)(25).

135 A Mixed-effect model with the lowest AIC, BIC, and DIC were chosen (Table 1).

136 Table 1 Model comparison between logistic regression and mixed effect Logistic regression

| Proposed model                   | AIC value | BIC value | DIC value(-2*LL) |
|----------------------------------|-----------|-----------|------------------|
| Logistic regression              | 3081.6    | 3207      | 3038             |
| Mixed effect logistic regression | 2877      | 3008.8    | 2832             |

137

138 Furthermore, the Intra-cluster Correlation Coefficient (ICC) value was 0.47 which is in support of choosing mixed effect Logistic  
139 regression over the basic model. Variables with  $\leq 0.2$  p-values in the bi-variable analysis were fitted in the multivariable model to  
140 measure the effect of each variable after adjusting for the effect of other variables. Adjusted Odds Ratio (AOR) with a 95%  
141 Confidence Interval (CI) and p-value  $< 0.05$  in the Multivariable model was declared as determinant factors associated with health  
142 facility delivery for the most recent live birth among women aged 15-49 in rural Ethiopia who had a live birth in the 5 years preceding  
143 the 2019 EMDHS. Multi-collinearity was also checked using Variance inflation factor (VIF), and a value of 10 was used as cut off.

#### 144 **Ethical Consideration**

145 Since this study is based on publicly available secondary data, formal ethical approval was not required. The author obtained the data  
146 from Demographic and Health Surveys (DHS) website (<https://dhsprogram.com/data/>) after an online request to access the data set.

147 Ethical procedures were done by the institutions that funded, commissioned, and managed the surveys, and no further ethical  
148 clearance was required. ICF international approved that all the DHS surveys follow the U.S. Department of Health and Human  
149 Services rules for respecting of human subjects' rights. Any personal identifiers like names, house numbers, and phone numbers were  
150 not included in the dataset. Furthermore as the study is secondary data analysis, gaining participants consent is not applicable to this  
151 study.

## 152 **Result**

### 153 **Characteristics of study populations**

154 This study includes a weighted number of 2900 reproductive aged women in rural Ethiopia, who gave birth in the last 5 years  
155 preceding the 2019 EMDHS, and was interviewed for their most recent live birth. The majority of the study participants (28.64) were  
156 between the age group of 25-34, and most of them (58.96 %) didn't have formal education. Furthermore, only (23.9 %) of them had  
157 media exposure to (TV or radio). The household wealth quintiles of (52.54%) of women were poor and below. Regarding their marital  
158 status and religion most of them were married /living with partner s(94.88%), and orthodox follower (36%) in religion .More than half  
159 (54%) of the participants had a household family size of more than 5 individuals, and around 89% of them were from households  
160 headed by males Table 2.

161 **Table 2** Percent distribution of women aged 15-49 in rural Ethiopia who had a live birth in the 5 years preceding the 2019 EMDHS by  
 162 socio-demographic characteristics according to a place of delivery for the most recent live birth from March 21, 2019, to June 28,  
 163 2019.

| Variables                    | Place of delivery for the most recent live birth |               |                 |               |       |               |               |  |
|------------------------------|--------------------------------------------------|---------------|-----------------|---------------|-------|---------------|---------------|--|
|                              | Non-health facility                              |               | Health facility |               | Total |               | Weighted<br>N |  |
|                              | %                                                | CI            | %               | CI            | %     | CI            |               |  |
| <b>Age of the respondent</b> |                                                  |               |                 |               |       |               |               |  |
| 15-24                        | 11.22                                            | [9.16,13.67]  | 13.57           | [11.28,16.23] | 24.78 | [22.46,27.27] | 719           |  |
| 25-34                        | 28.64                                            | [24.93,32.67] | 21.16           | [17.99,24.71] | 49.8  | [46.92,52.69] | 1444          |  |
| >=35                         | 16.15                                            | [13.90,18.70] | 9.26            | [7.67,11.14]  | 25.42 | [23.08,27.90] | 737           |  |
| Total                        | 56.01                                            | [49.85,62.00] | 43.99           | [38.00,50.15] | 100   |               | 2900          |  |
| <b>Educational status</b>    |                                                  |               |                 |               |       |               |               |  |
| no education                 | 39.34                                            | [34.48,44.42] | 19.62           | [16.68,22.93] | 58.96 | [54.67,63.12] | 1,710         |  |
| Primary                      | 15.63                                            | [13.02,18.64] | 18.53           | [15.36,22.18] | 34.16 | [30.92,37.55] | 991           |  |

|                                    |       |               |       |               |       |               |       |
|------------------------------------|-------|---------------|-------|---------------|-------|---------------|-------|
| Secondary                          | 1     | [0.60,1.67]   | 4.7   | [3.51,6.28]   | 5.7   | [4.39,7.37]   | 165   |
| Higher                             | 0.04  | [0.01,0.26]   | 1.13  | [0.68,1.88]   | 1.18  | [0.72,1.92]   | 34    |
| Total                              | 56.01 | [49.85,62.00] | 43.99 | [38.00,50.15] | 100   |               | 2,900 |
| <b>Wealth-index</b>                |       |               |       |               |       |               |       |
| Poor                               | 36.3  | [30.28,42.80] | 16.24 | [13.01,20.08] | 52.54 | [46.33,58.67] | 1,524 |
| Middle                             | 12.46 | [9.96,15.48]  | 11.73 | [9.36,14.59]  | 24.18 | [20.62,28.14] | 701   |
| rich                               | 7.25  | [5.59,9.36]   | 16.02 | [12.42,20.42] | 23.28 | [18.90,28.32] | 675   |
| Total                              | 56.01 | [49.85,62.00] | 43.99 | [38.00,50.15] | 100   |               | 2,900 |
| <b>Marital status</b>              |       |               |       |               |       |               |       |
| never in union                     | 0.22  | [0.08,0.55]   | 0.32  | [0.12,0.85]   | 0.53  | [0.26,1.07]   | 15    |
| married/living with partner        | 53.17 | [47.23,59.02] | 41.71 | [36.03,47.62] | 94.88 | [93.46,96.00] | 2,752 |
| divorced/no longer living together | 2.63  | [1.99,3.48]   | 1.96  | [1.20,3.18]   | 4.59  | [3.54,5.93]   | 133   |
| Total                              | 56.01 | [49.85,62.00] | 43.99 | [38.00,50.15] | 100   |               | 2,900 |
| <b>Religion</b>                    |       |               |       |               |       |               |       |
| Orthodox                           | 18.01 | [14.55,22.09] | 18.01 | [14.43,22.25] | 36.02 | [30.58,41.86] | 1,045 |
| Muslim                             | 21.19 | [15.44,28.36] | 14.53 | [9.61,21.38]  | 35.72 | [27.69,44.65] | 1,036 |

|                                                                           |       |               |       |               |       |               |       |
|---------------------------------------------------------------------------|-------|---------------|-------|---------------|-------|---------------|-------|
| Protestant                                                                | 15.2  | [11.03,20.58] | 11.01 | [7.42,16.03]  | 26.21 | [19.75,33.88] | 760   |
| Catholic                                                                  | 0.44  | [0.13,1.43]   | 0.01  | [0.00,0.02]   | 0.44  | [0.14,1.42]   | 13    |
| Traditional                                                               | 1     | [0.21,4.53]   | 0.37  | [0.12,1.17]   | 1.37  | [0.37,4.92]   | 40    |
| Others                                                                    | 0.18  | [0.05,0.60]   | 0.05  | [0.01,0.31]   | 0.23  | [0.09,0.63]   | 7     |
| Total                                                                     | 56.01 | [49.85,62.00] | 43.99 | [38.00,50.15] | 100   |               | 2,900 |
| <b>Sex of household head</b>                                              |       |               |       |               |       |               |       |
| Female                                                                    | 5.92  | [4.62,7.55]   | 4.63  | [3.64,5.88]   | 10.55 | [8.82,12.57]  | 306   |
| Male                                                                      | 50.1  | [44.18,56.01] | 39.35 | [33.86,45.13] | 89.45 | [87.43,91.18] | 2,594 |
| Total                                                                     | 56.01 | [49.85,62.00] | 43.99 | [38.00,50.15] | 100   |               | 2,900 |
| <b>Given birth to a boy or girl<br/>who was born alive but later died</b> |       |               |       |               |       |               |       |
| No                                                                        | 52.87 | [47.09,58.58] | 42.64 | [36.75,48.74] | 95.51 | [94.18,96.56] | 2,770 |
| Yes                                                                       | 3.14  | [2.24,4.38]   | 1.34  | [0.89,2.03]   | 4.49  | [3.44,5.82]   | 130   |
| Total                                                                     | 56.01 | [49.85,62.00] | 43.99 | [38.00,50.15] | 100   |               | 2,900 |
| <b>Household size</b>                                                     |       |               |       |               |       |               |       |
| Greater than 5                                                            | 34.89 | [30.33,39.74] | 19.2  | [16.11,22.71] | 54.08 | [50.42,57.70] | 1,568 |

|                                         |       |               |       |               |       |               |         |
|-----------------------------------------|-------|---------------|-------|---------------|-------|---------------|---------|
| Less than or equal to five              | 21.13 | [18.43,24.11] | 24.79 | [20.93,29.09] | 45.92 | [42.30,49.58] | 1,332   |
| Total                                   | 56.01 | [49.85,62.00] | 43.99 | [38.00,50.15] | 100   |               | 2,900   |
| <b>Geopolitical features of regions</b> |       |               |       |               |       |               |         |
| Metropolitans                           | 0.27  | [0.21,0.34]   | 0.3   | [0.18,0.48]   | 0.57  | [0.45,0.71]   | 16      |
| Small peripheral regions                | 6.08  | [5.14,7.18]   | 1.82  | [1.35,2.46]   | 7.9   | [6.95,8.97]   | 229     |
| large central regions                   | 49.66 | [43.54,55.80] | 41.87 | [35.95,48.03] | 91.53 | [90.44,92.50] | 2,655   |
| Total                                   | 56.01 | [49.85,62.00] | 43.99 | [38.00,50.15] | 100   |               | 2,900   |
| <b>Media exposure (radio &amp; TV)</b>  |       |               |       |               |       |               |         |
| no media exposure                       | 45.94 | [40.68,51.29] | 30.16 | [25.80,34.91] | 76.1  | [72.97,78.97] | 2,182   |
| has media exposure                      | 10.32 | [8.27,12.80]  | 13.58 | [10.76,17.00] | 23.9  | [21.03,27.03] | 685     |
| Total                                   | 56.26 | [50.08,62.25] | 43.74 | [37.75,49.92] | 100   |               | 2,868** |

164 \*\* N=2868 because 32 respondents were not de jure residents to be asked about their media exposure.

165

166 **The Magnitude of health institution delivery, and frequency and timing of the study population’s ANC visit**  
167 **for their most recent live birth**

168 Only 44% [38.00, 50.15] of reproductive-age women in rural Ethiopia gave their most recent live birth in health institutions. Even  
169 though most of the participants 67.94% [62.78, 72.70] had started ANC visit in their first trimester of pregnancy, the majority of them  
170 62.52% [58.51, 66.37] didn’t attend four or more ANC visit Fig 2.

171 **Fig 2: Place of delivery, timing, and frequency of ANC visit for the most recent live birth among women of age 15-49 in rural**  
172 **Ethiopia who had a live birth in the 5 years preceding the 2019 EMDHS.**

173 **Factors associated with Health Facility Delivery for the Most Recent Live Birth**

174 Variables like ANC by Skilled provider were excluded from the analysis because of multi-collinearity with having ANC in the first  
175 trimester of pregnancy. Variables like the sex of the household head, and having a son or daughter died were excluded from  
176 multivariable analysis since their p-value was greater than 0.2 at bi-variable analysis. In the multivariable multilevel binary logistic  
177 regression analysis educational status ,wealth index, religion, household family size, attending 4+ANC,and had ANC in the first  
178 trimester of pregnancy were found to be statistically significant factors associated with health facility delivery for the most recent  
179 live birth among women of reproductive age in rural Ethiopia.

180 The odds of giving birth at a health facility for the most recent live birth among women of reproductive age in rural Ethiopia  
181 adolescent girls with the educational status of primary, secondary and higher education were 1.55 (AOR = 1.55, 95% CI: 1.21 - 1.99),



182 3.35 (AOR = 3.35, 95% CI: 1.91 - 5.87), and 20.42 (AOR = 20.42, 95% CI: 2.76 - 151.11) times higher than women of reproductive  
183 age in rural Ethiopia with no formal education.

184 The probability of giving birth in health facilities increased as the household wealth index increased. The middle wealth quintiles were  
185 1.48 (AOR=1.48, 95%CI: 1.13 - 1.94) times more likely to give birth in a health facility than those in the poor wealth quintiles. The  
186 rich wealth quintiles were 2.53(AOR=2.53, 95%CI: 1.82 - 3.51) times more likely to deliver their most recent live birth in a health  
187 facility than those in the poor wealth quintiles.

188 Women with traditional religion lower odds of giving birth in a health facility by 76% (AOR = 0.24; 95% CI: 0.09 - 0.68) as  
189 compared with orthodox religion followers.

190 The odds of giving birth at a health facility was 1.43 times (AOR = 1.43; 95% CI: 1.12 - 1.82) higher among women with household  
191 family size of less than or equal to five compared to women with household family size of above five.

192 Looking at the frequency of ANC visit women made for the most recent live birth in 5 years preceding the 2019 EMDHS, women who  
193 had more than four ANC visit had 1.99 times (AOR = 1.99; 95%CI: 1.58 - 2.51) higher odds of giving birth at a health facility as  
194 compared to their counterparts.

195 Mothers who had ANC visit in the first trimester for the most recent live birth were 3.93 times more likely to give birth in a health  
196 facility than women who didn't have an ANC visit in the first trimester of their pregnancy (AOR=3.93.95%CI=2.95 - 5.25)Table3.

197 Table 3 Bi-variable and multivariable multilevel binary logistic regression analysis of factors associated with health facility delivery  
 198 for the most recent live birth among women aged 15-49 in rural Ethiopia who had a live birth in the 5 years preceding the 2019  
 199 EMDHS.

| Variables          |                | COR(95%CI) |                | AOR (95%CI) |               |
|--------------------|----------------|------------|----------------|-------------|---------------|
| Age of respondents | 15-24          | 2.55**     | 1.95 - 3.34    | 1.25        | 0.88 - 1.78   |
|                    | 25-34          | 1.38**     | 1.09 - 1.73    | 0.82        | 0.63 - 1.08   |
|                    | >=35           | 1          |                | 1           |               |
| Educational status | No education   | 1          |                | 1           |               |
|                    | Primary        | 2.28**     | 1.85 - 2.82    | 1.55***     | 1.21 - 1.99   |
|                    | Secondary      | 8.93**     | 5.33 - 14.99   | 3.35***     | 1.91 - 5.87   |
|                    | Higher         | 86.92**    | 12.15 - 621.77 | 20.42***    | 2.76 - 151.11 |
| Wealth index       | Poor           | 1          |                |             |               |
|                    | Middle         | 1.89**     | 1.48 - 2.42    | 1.48***     | 1.13 - 1.94   |
|                    | Rich           | 3.78**     | 2.85 - 5.01    | 2.53***     | 1.82 - 3.51   |
| Marital status     | Never in union | 1          |                | 1           |               |

|                                  |                                    |        |             |         |             |
|----------------------------------|------------------------------------|--------|-------------|---------|-------------|
|                                  | Married/living with partner        | 0.61   | 0.17 - 2.22 | 0.55    | 0.11 - 2.77 |
|                                  | Divorced/no longer living together | 0.40** | 0.10 - 1.55 | 0.48    | 0.09 - 2.57 |
| Religion                         | Orthodox                           | 1      |             | 1       |             |
|                                  | Muslim                             | 0.66** | 0.42 - 1.06 | 1.00    | 0.61 - 1.63 |
|                                  | Protestant                         | 1.01   | 0.65 - 1.55 | 0.74    | 0.48 - 1.14 |
|                                  | Catholic                           | 0.02** | 0.00 - 1.94 | 0.02    | 0.00 - 2.67 |
|                                  | Traditional                        | 0.16** | 0.06 - 0.42 | 0.24*** | 0.09 - 0.68 |
|                                  | Others                             | 0.45   | 0.05 - 4.08 | 0.19    | 0.01 - 2.41 |
| Sex of household head            | Female                             | 1      |             |         |             |
|                                  | Male                               | 1.08   | 0.78 - 1.48 |         |             |
| Having son or daughter died      | No                                 | 1      |             |         |             |
|                                  | Yes                                | 0.74   | 0.47 - 1.18 |         |             |
| Household size                   | Greater than five                  | 1      |             | 1       |             |
|                                  | Less than or equal to five         | 1.96** | 1.62 - 2.38 | 1.43*** | 1.12 - 1.82 |
| Geopolitical features of regions | Metropolitans                      | 1      |             | 1       |             |

|                                             |                          |        |             |         |             |
|---------------------------------------------|--------------------------|--------|-------------|---------|-------------|
|                                             | Small peripheral regions | 0.30** | 0.07 - 1.31 | 0.61    | 0.14 - 2.69 |
|                                             | Large central regions    | 1.01   | 0.24 - 4.13 | 0.95    | 0.22 - 4.10 |
| Media exposure (radio & TV)                 | No media exposure        | 1      |             | 1       |             |
|                                             | has media exposure       | 1.68** | 1.34 - 2.12 | 1.09    | 0.84 - 1.41 |
| Attend 4+ANC visit                          | No                       | 1      |             | 1       |             |
|                                             | Yes                      | 3.47** | 2.83 - 4.25 | 1.99*** | 1.58 - 2.51 |
| Had ANC in the first Trimester of pregnancy | No                       | 1      |             | 1       |             |
|                                             | Yes                      | 6.43** | 4.98 - 8.30 | 3.93*** | 2.95 - 5.25 |

200 \*\* p<0.2 \*\*\* p<0.05

201

## 202 Discussion

203 This study aimed to assess the magnitude and factors affecting the utilization of health facility delivery of the most recent live birth  
 204 among women of reproductive age in rural Ethiopia using data from the most recent EMDHS 2019. According to this study, only 44%  
 205 of reproductive-age women in rural Ethiopia gave their most recent live birth in health institutions. This is consistency with a study  
 206 conducted in different parts of Ethiopia(19, 26, 27), and rural Haiti(28).This magnitude of institutional delivery is lower than a study

207 conducted in northwest Ethiopia(8, 29), women in rural Ghana(30-32), and rural women in Nepal(33), and it's higher than a study  
208 conducted in Nigeria(34). This might be because of the studies conducted in northwest Ethiopia were based on a small sample or  
209 small segment of a population of rural Ethiopia while the current study is based on representative data of the whole women of  
210 reproductive age in rural Ethiopia. And also it might be due to the differences in socio-cultural characteristics as well as difference in  
211 utilization of maternal health services like ANC service. In this study Majority of study populations 62.52% didn't attend four or more  
212 ANC visits for the most recent pregnancy whereas a study conducted in Ghana reports that 67.9% ,and 75% of women attend four or  
213 more ANC visit during their recent pregnancy (31, 32).

214 In multivariable multilevel logistic regression analysis educational status, wealth index, religion, household family size, attending  
215 4+ANC, and ANC in the first trimester of pregnancy were found to be statistically significant factors associated with health facility  
216 delivery for the most recent live birth among women of reproductive age in rural Ethiopia. Consistent with different studies conducted  
217 in Ethiopia (19, 35), Bangladesh (36), Ghana (31, 37), and Senegal (38)the probability of delivering in a health facility increases  
218 parallel with increasing women's educational status. Women with Primary, secondary, and higher educational status had higher odds  
219 of giving birth in a health facility compared with women with no formal education. This might be because women with good  
220 educational status might have better information processing skills and improved cognitive skills that enable them to understand the  
221 purpose of health facility delivery and the risk of home delivery, which will result in the confidence to choose health facilities as a  
222 place of delivery (35).Moreover, women with good educational status might have a high chance of reading and understanding  
223 information about health facility delivery(37).

224 In this study wealth index is another most important variable significantly associated with giving birth in a health facility for the most  
225 recent live birth among women of reproductive age in rural Ethiopia. That is women with middle and higher household wealth indexes  
226 were more likely to report institutional delivery as compared with women with poor household wealth indexes. This finding is  
227 consistent with a study conducted in Ethiopia (19, 35, 39), Uganda (40), India (41), Ghana (37, 42), and Cambodia (43). Such  
228 discrepancy associated with wealth status might be due to the cost of transportation and any other extra cost associated with giving  
229 birth in health institutions (39). In addition, women with poor household wealth status might have a low educational status that in turn  
230 affects their decision to give birth in health facility.

231 In line with a study conducted in Mozambique (44), this study reveals as religion has a significant association with a health facility  
232 delivery. Women who are a follower of traditional religion were less likely to give birth in health institutions than women who follow  
233 orthodox religion. This might be due to their exposure to religious beliefs and norms that discourage certain health behaviors like  
234 exposing their body to health personnel while giving birth at a health facility, or using modern medicine (32, 44).

235 The household family size had a significant association with giving birth at a health facility in which women from household family  
236 size of less than five have higher odds of giving birth in a health facility. The potential justification for this discrepancy might be as a  
237 consequence of a small number of family size women might have a good economy to cover the transportation and related costs while  
238 traveling to health facilities.

239 Moreover, in this study the frequency of ANC visit women made for the most recent live birth was significantly associated with the  
240 place of delivery, meaning that women who had more than four ANC visit had a higher probability of giving birth at a health facility  
241 as compared to their counterparts. This is in line with the previous study conducted in Ethiopia (8, 24, 35), and Ghana (31). This might  
242 be due to the exposure of women with frequent ANC to repeated counseling about birth preparedness and complication readiness that  
243 can encourage mothers to deliver at a health facility(8).

244 Furthermore, Mothers who had ANC visit in the first trimester for the most recent live birth were more likely to give birth in health  
245 facility than women who didn't have ANC visit in the first trimester. This is consistent with a study conducted in Ghana (32), this  
246 might be due to the opportunity women got to have frequent contact with health professionals that will enable them to get adequate  
247 information on the benefit of giving birth in a health facility to themselves and their newborn's health, as well as the women might  
248 acquire good awareness about the possible complications related with home delivery (32).

249 One of the strengths of this study was its trial to fill the gap of equity by addressing rural women by using large population-based data  
250 with large sample size, so it can be generalized to all women of reproductive age group in rural Ethiopia, and it will help as a baseline  
251 information to provide audience specific/tailored public health interventions in rural Ethiopia. Furthermore, the use of advanced  
252 statistical methods capable of accommodating the hierarchal nature of DHS data is also strength. This study might have limitations.  
253 First, since we use secondary data some potentially important predictors were not available like distance from a health facility,  
254 knowledge, and attitude towards health facility delivery. Secondly, EMDHS 2019 was a questionnaire-based survey and asked women

255 about their live births for the past five years before the survey, so recall bias might be the other limitation, but we try to minimize this  
256 by considering only the most recent live birth with in the past five years of the survey.

## 257 **Conclusion**

258 In a rural part of Ethiopia, the prevalence of institutional delivery is low. Health facility delivery among reproductive age women of  
259 rural Ethiopia was significantly associated with educational status, wealth index, and religion, household family size, attending 4+  
260 ANC, and having ANC visits in the first trimester of pregnancy. Thus, especial emphasis should be given to those mothers with no  
261 formal education, with poor household wealth index, traditional religious followers, and mothers with more than five household  
262 family sizes. Furthermore implementing public health programs that target to enable women to have early first trimester ANC with  
263 more frequent ANC follow-up may be an effective way to increase the number of health facility deliveries.

## 264 **Abbreviations**

265 ANC: Ante Natal Care, AOR: Adjusted Odds Ratio. CI: Confidence Interval, COR: Crude Odds Ratio, DHS; Demographic and Health Survey

266 EMDHS: Ethiopian Mini Demographic and Health Survey, SDG: Sustainable Development Goal

## 267 **Acknowledgments**

268 The author would like to extend his acknowledgment to the measure DHS for providing the data.



## 269 **References**

- 270 1. WHO U, UNFPA, World Bank Group and the United Nations Population Division. Trends in maternal mortality 2000 to 2017: estimates  
271 by WHO, UNICEF, UNFPA, world bank group and the United nations population division. Geneva ...; 2019.
- 272 2. Amdie FZ, Landers T, Woo K. Institutional delivery in Ethiopia: Alternative Options for Improvement. *International Journal of Africa*  
273 *Nursing Sciences*. 2022;100436.
- 274 3. Organization WH. World health statistics 2016: monitoring health for the SDGs sustainable development goals: World Health  
275 Organization; 2016.
- 276 4. Callister LC, Edwards JE. Sustainable Development Goals and the Ongoing Process of Reducing Maternal Mortality. *Journal of Obstetric,*  
277 *Gynecologic & Neonatal Nursing*. 2017;46(3):e56-e64.
- 278 5. Gebremichael SG, Fenta SM. Determinants of institutional delivery in Sub-Saharan Africa: findings from Demographic and Health  
279 Survey (2013–2017) from nine countries. *Tropical Medicine and Health*. 2021;49(1):45.
- 280 6. Paul VK, editor The current state of newborn health in low income countries and the way forward. *Seminars in Fetal and Neonatal*  
281 *Medicine*; 2006: Elsevier.
- 282 7. Eshete A, Alemu A, Zerfu TA. Magnitude and Risk of Dying among Low Birth Weight Neonates in Rural Ethiopia: A Community-Based  
283 Cross-Sectional Study. *International journal of pediatrics*. 2019;2019:9034952.
- 284 8. Eshete T, Legesse M, Ayana M. Utilization of institutional delivery and associated factors among mothers in rural community of Pawe  
285 Woreda northwest Ethiopia, 2018. *BMC research notes*. 2019;12(1):395.

- 286 9. Kebede A, Hassen K, Nigussie Teklehaymanot A. Factors associated with institutional delivery service utilization in Ethiopia.  
287 International journal of women's health. 2016;8:463-75.
- 288 10. Sully EA, Biddlecom AS, Darroch JE. Not all inequalities are equal: differences in coverage across the continuum of reproductive health  
289 services. BMJ global health. 2019;4(5):e001695.
- 290 11. Doctor HV, Nkhana-Salimu S, Abdulsalam-Anibilowo M. Health facility delivery in sub-Saharan Africa: successes, challenges, and  
291 implications for the 2030 development agenda. BMC public health. 2018;18(1):765.
- 292 12. Dewau R, Angaw DA, Kassa GM, Dagneb B, Yeshaw Y, Muche A, et al. Urban-rural disparities in institutional delivery among women  
293 in East Africa: A decomposition analysis. PloS one. 2021;16(7):e0255094.
- 294 13. Bobo FT, Yesuf EA, Woldie M. Inequities in utilization of reproductive and maternal health services in Ethiopia. International journal for  
295 equity in health. 2017;16(1):105.
- 296 14. Nigusie A, Azale T, Yitayal M. Institutional delivery service utilization and associated factors in Ethiopia: a systematic review and  
297 META-analysis. BMC Pregnancy Childbirth. 2020;20(1):364.
- 298 15. . EPHIEEaI. Ethiopia Mini Demographic and Health  
299 Survey 2019: Final Report. Rockville, Maryland, USA: EPHI and ICF. 2021.
- 300 16. Chernet AG, Dumga KT, Cherie KT. Home Delivery Practices and Associated Factors in Ethiopia. Journal of reproduction & infertility.  
301 2019;20(2):102-8.
- 302 17. Yaya S, Bishwajit G, Ekholuenetale M, Shah V, Kadio B, Udenigwe O. Factors associated with maternal utilization of health facilities for  
303 delivery in Ethiopia. International health. 2018;10(4):310-7.

- 304 18. Yoseph M, Abebe SM, Mekonnen FA, Sisay M, Gonete KA. Institutional delivery services utilization and its determinant factors among  
305 women who gave birth in the past 24 months in Southwest Ethiopia. *BMC health services research*. 2020;20(1):265.
- 306 19. Berelie Y, Yeshiwas D, Yismaw L, Alene M. Determinants of institutional delivery service utilization in Ethiopia: a population based  
307 cross sectional study. *BMC public health*. 2020;20(1):1077.
- 308 20. Gilano G, Hailegebreal S, Seboka BT. Determinants and spatial distribution of institutional delivery in Ethiopia: evidence from Ethiopian  
309 Mini Demographic and Health Surveys 2019. *Archives of Public Health*. 2022;80(1):1-12.
- 310 21. Hassen SS, Jemal SS, Bambo Mm, Lelisho ME, Tareke SA, Merera AM, et al. Multilevel analysis of factors associated with utilization of  
311 institutional delivery in Ethiopia. *Women's Health*. 2022;18:17455057221099505.
- 312 22. Tessema ZT, Tamirat KS. Determinants of high-risk fertility behavior among reproductive-age women in Ethiopia using the recent  
313 Ethiopian Demographic Health Survey: a multilevel analysis. *Tropical Medicine and Health*. 2020;48(1):1-9.
- 314 23. Asefa A, Gebremedhin S, Messele T, Letamo Y, Shibru E, Alano A, et al. Mismatch between antenatal care attendance and institutional  
315 delivery in south Ethiopia: A multilevel analysis. *BMJ open*. 2019;9(3):e024783.
- 316 24. Fekadu A, Yitayal M, Alemayehu GA, Abebe SM, Ayele TA, Tariku A, et al. Frequent Antenatal Care Visits Increase Institutional  
317 Delivery at Dabat Health and Demographic Surveillance System Site, Northwest Ethiopia. *Journal of pregnancy*. 2019;2019:1690986.
- 318 25. Hamaker EL, van Hattum P, Kuiper RM, Hoijsink H. Model selection based on information criteria in multilevel modeling. *Handbook of*  
319 *advanced multilevel analysis*. 2011:231-55.
- 320 26. Arba MA, Darebo TD, Koyira MM. Institutional Delivery Service Utilization among Women from Rural Districts of Wolaita and Dawro  
321 Zones, Southern Ethiopia; a Community Based Cross-Sectional Study. *PloS one*. 2016;11(3):e0151082.

- 322 27. Tekelab T, Yadecha B, Melka AS. Antenatal care and women's decision making power as determinants of institutional delivery in rural  
323 area of Western Ethiopia. *BMC research notes*. 2015;8:769.
- 324 28. Séraphin MN, Ngnie-Teta I, Ayoya MA, Khan MR, Striley CW, Boldon E, et al. Determinants of institutional delivery among women of  
325 childbearing age in rural Haiti. *Maternal and child health journal*. 2015;19(6):1400-7.
- 326 29. Nigusie A, Azale T, Yitayal M, Derseh L. Institutional delivery and associated factors in rural communities of Central Gondar Zone,  
327 Northwest Ethiopia. *PloS one*. 2021;16(7):e0255079.
- 328 30. Boah M, Adampah T, Jin B, Wan S, Mahama AB, Hyzam D, et al. "I couldn't buy the items so I didn't go to deliver at the health facility"  
329 Home delivery among rural women in northern Ghana: A mixed-method analysis. *PloS one*. 2020;15(3):e0230341.
- 330 31. Gudu W, Addo B. Factors associated with utilization of skilled service delivery among women in rural Northern Ghana: a cross sectional  
331 study. *BMC Pregnancy Childbirth*. 2017;17(1):159.
- 332 32. Boah M, Mahama AB, Ayamga EA. They receive antenatal care in health facilities, yet do not deliver there: predictors of health facility  
333 delivery by women in rural Ghana. *BMC Pregnancy Childbirth*. 2018;18(1):125.
- 334 33. Sharma SR, Poudyal AK, Devkota BM, Singh S. Factors associated with place of delivery in rural Nepal. *BMC public health*.  
335 2014;14:306.
- 336 34. Adewuyi EO, Zhao Y, Auta A, Lamichhane R. Prevalence and factors associated with non-utilization of healthcare facility for childbirth  
337 in rural and urban Nigeria: Analysis of a national population-based survey. *Scandinavian journal of public health*. 2017;45(6):675-82.
- 338 35. Fekadu GA, Ambaw F, Kidanie SA. Facility delivery and postnatal care services use among mothers who attended four or more antenatal  
339 care visits in Ethiopia: further analysis of the 2016 demographic and health survey. *BMC Pregnancy Childbirth*. 2019;19(1):64.

- 340 36. Pervin J, Venkateswaran M, Nu UT, Rahman M, O'Donnell BF, Friberg IK, et al. Determinants of utilization of antenatal and delivery  
341 care at the community level in rural Bangladesh. *PloS one*. 2021;16(9):e0257782.
- 342 37. Dankwah E, Zeng W, Feng C, Kirychuk S, Farag M. The social determinants of health facility delivery in Ghana. *Reprod Health*.  
343 2019;16(1):101.
- 344 38. Zegeye B, Ahinkorah BO, Idriss-Wheelr D, Oladimeji O, Olorunsaiye CZ, Yaya S. Predictors of institutional delivery service utilization  
345 among women of reproductive age in Senegal: a population-based study. *Archives of public health = Archives belges de sante publique*.  
346 2021;79(1):5.
- 347 39. Ketemaw A, Tareke M, Dellie E, Sitotaw G, Deressa Y, Tadesse G, et al. Factors associated with institutional delivery in Ethiopia: a cross  
348 sectional study. *BMC health services research*. 2020;20(1):266.
- 349 40. Mugambe RK, Yakubu H, Wafula ST, Ssekamatte T, Kasasa S, Isunju JB, et al. Factors associated with health facility deliveries among  
350 mothers living in hospital catchment areas in Rukungiri and Kanungu districts, Uganda. *BMC Pregnancy Childbirth*. 2021;21(1):329.
- 351 41. Kesterton AJ, Cleland J, Sloggett A, Ronsmans C. Institutional delivery in rural India: the relative importance of accessibility and  
352 economic status. *BMC Pregnancy Childbirth*. 2010;10:30.
- 353 42. Kumbeni MT, Apanga PA. Institutional delivery and associated factors among women in Ghana: findings from a 2017-2018 multiple  
354 indicator cluster survey. *International health*. 2021;13(6):520-6.
- 355 43. Pierce H. Increasing health facility deliveries in Cambodia and its influence on child health. *International journal for equity in health*.  
356 2019;18(1):67.

357 44. Cau BM, Agadjanian V. Religion and Use of Institutional Child Delivery Services: Individual and Contextual Pathways in Mozambique.

358 International perspectives on sexual and reproductive health. 2019;45:35-43.

359

Household interviewed in 2019  
EMDHS=8663

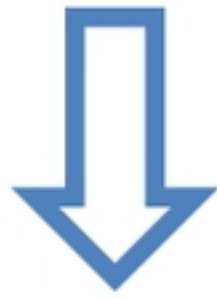

Weighted number of reproductive aged  
women interviewed in 2019 EMDHS =8885

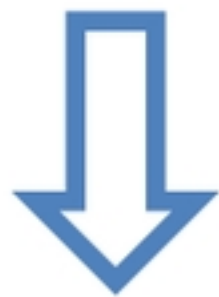

Weighted number of women interviewed  
medRxiv preprint doi: <https://doi.org/10.1101/2023.01.06.23284261>; this version posted January 9, 2023. The copyright holder for this preprint (which was not certified by peer review) is the author/funder, who has granted medRxiv a license to display the preprint in perpetuity. It is made available under a [CC-BY 4.0 International license](https://creativecommons.org/licenses/by/4.0/).  
about their most recent live birth in the last 5  
years preceding the 2019 EMDHS =3927

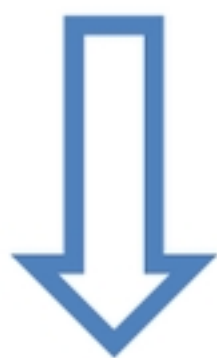

Weighted number of women in **rural**  
Ethiopia interviewed for their most recent  
live birth in the last 5 years preceding the  
2019 EMDHS =2900

Fig1

# Place of delivery, timing and frequency of ANC visit

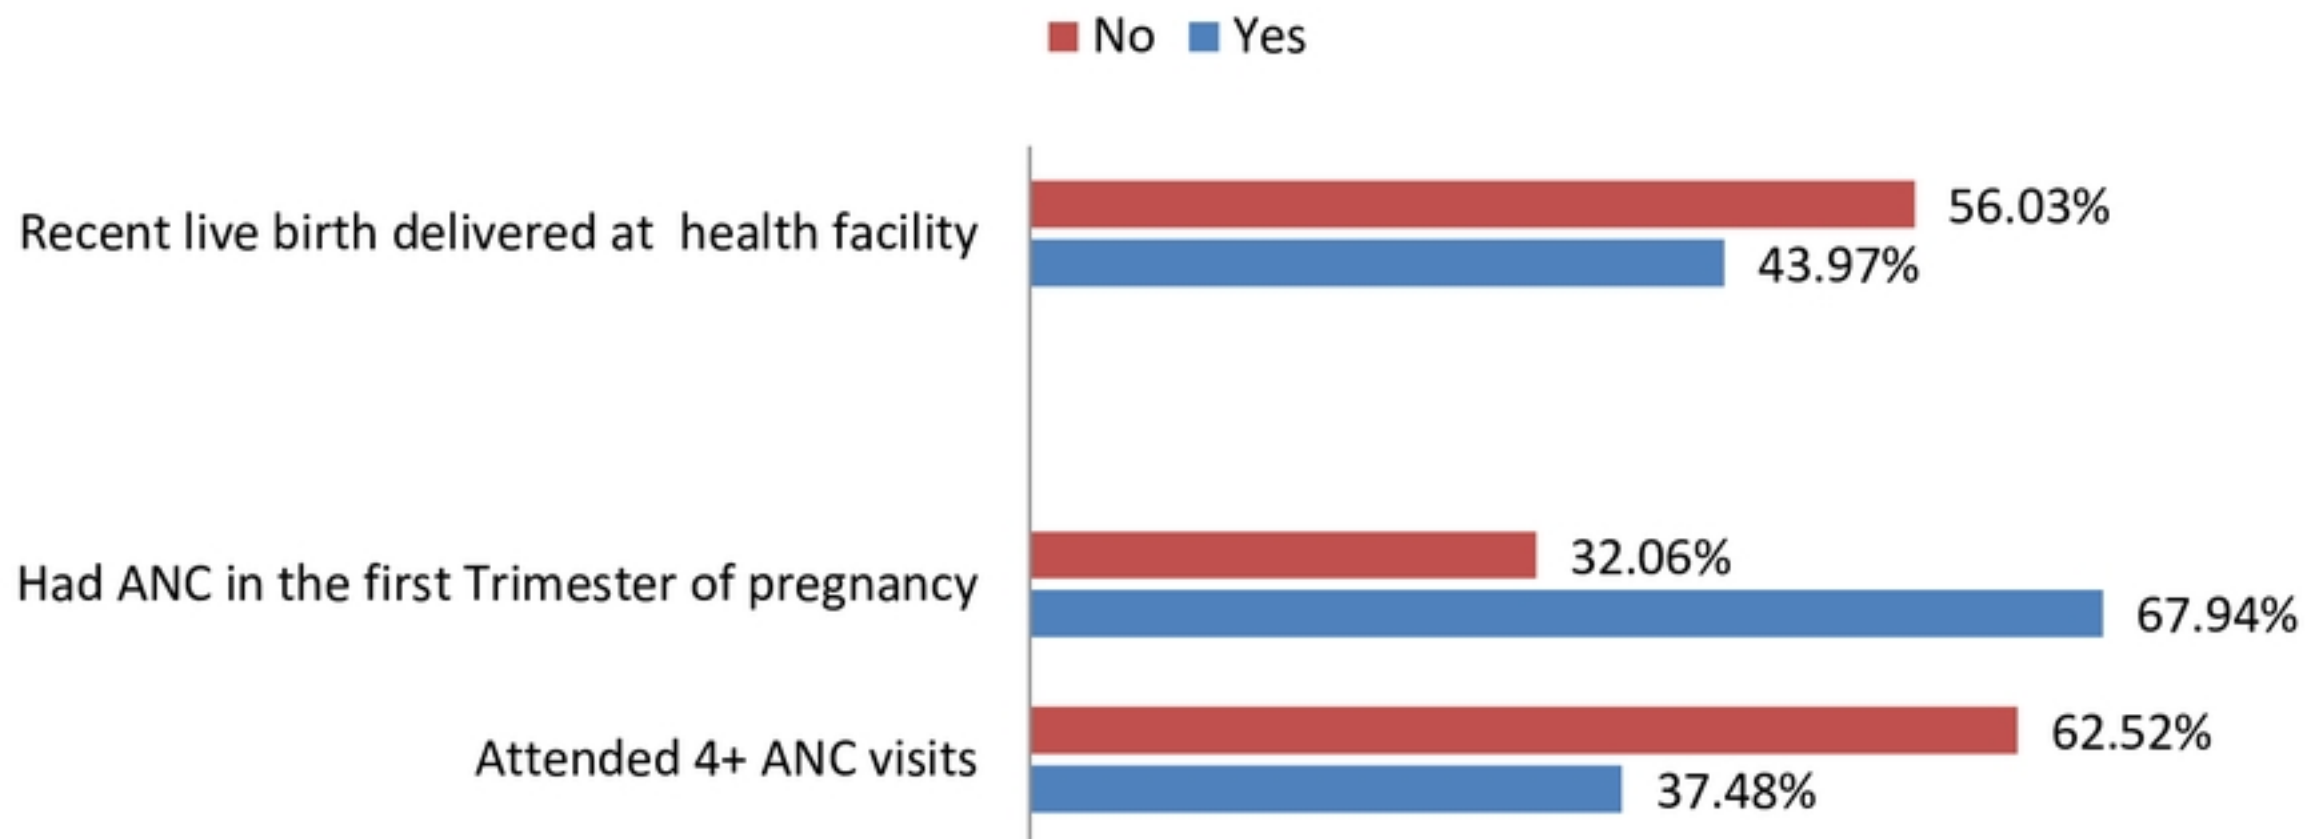

Fig2
